# Supplementary material
Source: PubMed Central journal article supplement (PMC3100963)
Supplement: 1016846108_pnas.201016846SI.pdf [file 1016846108_pnas.201016846SI.pdf]

# Supporting Information

Chadès et al. 10.1073/pnas.1016846108

## SI Methods

**Simulation Results.** A star network with 101 nodes was used as a test case to compare our rules of thumb with the outside-in strategy assuming perfect detection. The test network consisted of a central node with five arms, each of length 20 nodes. Baseline parameters for the simulations were  $p_d = 0.1$ ,  $p_m = 0.7$ , and  $p_e = 0$ . To test the effect of a network with heterogeneous infection and recovery parameters, the baseline parameters  $p_d$  and  $p_m$  were allowed to vary randomly above or below the baseline level in increments of 0.05 and 0.1, respectively, up to a maximum amount in each time step. Different amounts of variation were tested. We tested variations in  $p_d$  of 0, 0.05, and 0.1 and variations in  $p_m$  of 0, 0.1, 0.2, and 0.3 (Table S2). The rule of thumb and the outside-in management strategy were simulated 30 times each on 30 randomly generated test networks. It was assumed that all patches were initially infected in each simulation. Each simulation was run for 700 time steps and the average time to eradication was computed. For each parameter combination, we also varied the number of nodes managed per time step. We tested scenarios in which 1, 2, or 5 nodes could be managed per time step (Figs. S1–S3).

Our rules of thumb outperform the outside-in strategy regardless of the probabilities of infection and recovery and regardless of the number of patches that are managed in each time step. Increasing the variation in the probability of recovery made our rule of thumb show slightly increased performance relative to the outside-in strategy, although increasing the variation in the probability of infection did not seem to affect the scale of the improvement for the values tested.

The time to eradication decreases as more patches are able to be managed in each time step. We found that the relative benefits of our rules of thumb are greater when fewer patches are managed in each time step. The reason that our rule of thumb outperforms the outside-in strategy is because reinfections are less likely to occur using our rule of thumb. The longer the time it takes to eradicate the infection, the more opportunity there is for reinfections to take place, and the greater the benefit of our rule of thumb over the outside-in strategy. By managing multiple patches in a time step, the time to eradication is reduced, which makes the performance of the two strategies more similar.

**Factored POMDP.** Using the Bellman principle of optimality and the previously defined FPOMDP parameters (Methods in main text), we can calculate the optimal  $t$ -step value function from the  $(t - 1)$ -step value function,

$$V_0^*(b) = \min_{a \in A} \left[ \sum_{s \in S} R(s, a) \Pr(s|b) \right], \quad [\text{S1}]$$

$$V_t^*(b) = \min_{a \in A} \left[ \sum_{s \in S} R(s, a) \Pr(s|b) + \sum_{s' \in S} \sum_{z \in Z} \Pr(s|b) P(s'|s, a) O(z|s', a) V_{t-1}^*(b_z^a) \right], \quad [\text{S2}]$$

where  $\Pr(s|b)$  represents the probability of being in state  $s$  given a belief state  $b$ , and  $b_z^a$  is the belief state assuming action  $a$  and observation  $z$  and  $P$  is the state-action transition matrix. Eq. S1 minimizes the expected sum of instantaneous costs when there is no time left to manage for the infection. Similarly when there are  $t$  steps to go, Eq. S2 minimizes the instantaneous costs and the future expected costs for the remaining  $t - 1$  steps. Interested

readers could refer to Cassandra et al. (1) for further explanations of the dynamic programming equations.

The optimal solution  $\pi$  can be represented in two different ways. We can either apply directly the strategy function for each belief state we are in or represent the optimal strategy as a policy graph. The policy graph automatically generates all of the possible transitions over time given the performed action and the new observation, whereas the use of strategy functions requires updating the belief state using Bayes' rule given the performed action and the new observation. After performing action  $a$  and observing  $z$ , the updated belief  $b_z^a$  can be calculated from the previous belief  $b$ :

$$b_z^a(s') = \Pr(s'|b, a, z), \quad [\text{S3}]$$

$$b_z^a(s') = \frac{O(z|a, s') \sum_{s \in S} P(s'|s, a) b(s)}{\Pr(z|a, b)}, \quad [\text{S4}]$$

with

$$\Pr(z|a, b) = \sum_{s \in S} \sum_{s' \in S} O(z|s', a) P(s'|s, a) b(s). \quad [\text{S5}]$$

**Algebraic Decision Diagram.** The components of our optimization models (transition probabilities, rewards, and costs) are computationally represented with algebraic decision diagrams (2). Fig. S6 illustrates how the dynamic of node 3 ( $s_3$ ) connected to node 2 ( $s_2$ ) can be defined following our discrete-time SIS model assuming a line network and no management occurs (e.g., the action is do nothing). Our decision tool automatically generates the transition probabilities for each node and action on the basis of the structure of the network.

**Analytic Approximation.** We highlight the similarities between managing invasive species or disease (model 1) and managing a threatened species (model 2). For both POMDP models, the sets of states, actions, observations, and observation functions can be defined in the same way.

The main difference between both models resides in the effect of the manage action on the state transition model ( $P$ ). Although managing an invasive species or a disease decreases the local probability of persistence ( $p_{m1} < p_{o1}$ ), managing a threatened species increases its local probability of persistence ( $p_{m2} > p_{o2}$ ). Also for an invasive species or disease we would expect a probability of persistence equal to or close to 1 when not managed, whereas a threatened species by definition will have a probability of persistence  $< 1$  ( $1 \geq p_{o1} > p_{o2}$ ). Note that “survey” and do nothing have the same effect on the state dynamic for both models and the ability to detect the state infected is defined in the same way.

In the case of a disease or a pest the optimization objective is to maximize the expected number of susceptible nodes (model 1) or maximize the expected number of infected nodes (model 2) over time. This information is expressed by defining the cost or reward functions  $R_1(s, a) = r_1(s) + c_1(a)$  and  $R_2(s, a) = r_2(s) + c_2(a)$  with  $s$  in  $S_t$ ,  $a$  in  $A_t$ , and  $r_t$  the immediate reward of being in a state and the cost of performing an action  $c_t$ . Actions have the same cost for both models but the cost or reward of being in a state is defined differently for both models. Here we use  $r_1(\text{infected}) = -V$  and  $r_2(\text{infected}) = V$  and  $r_1(\text{susceptible}) = -r_2(\text{susceptible}) = 0$ , with  $V$  a positive value representing the economic benefits of a persisting threatened species or the

economic loss of a persisting disease or invasive species. The objective can also be expressed as the minimization of the expected number of infected nodes (model 1) or the expected number of susceptible nodes in the case of a threatened population (model 2). In absence of detection of the species/disease,

$$T_s = \frac{\log[b_{s/n}(1-p_0(1-d(1-b_{m/s}))) / b_{m/s}(1-p_0(1-d(1-b_{s/n})))]}{\log[(1-d)p_0]}$$

with  $b_{s/n}$  defined as

$$b_{s/n} \approx \frac{c_s(1-p_m)(1-p_0)}{[p_0d(V(p_m-p_0+p_0^T(1-p_m^T)-p_m(1-p_0)-c_m(1-p_m)(1-p_0)(T-1)))]}$$

these two models share a same solution structure: manage, survey, and do nothing.

From ref. 3 we know that the time we should spend managing is dependent on the belief of persistence of the species at the boundary between managing and surveying  $b_{m/s}$ ,

$$T_m = \frac{\log(b_{m/s})}{\log(p_m)}$$

with  $p_m$  the probability of persistence of the species when managed and

$$b_{m/s} \approx \frac{(c_m - c_s)}{[2c_m dp_0 + V(p_m - p_0)(1 + (1 - d)p_0(1 + p_0) - dp_0 p_m)]}$$

with  $p_0$  the probability of persistence of the species when not managed, and  $d$  the probability of the species being detected if present when we survey.

Similarly the time we should spend surveying is defined by

with  $T$  the time we should spend surveying. For an  $n$ -population POMDP, the cost of managing ( $c_m$ ), the cost of surveying ( $c_s$ ), and the economic value of the species ( $V$ ) remain unchanged as we manage or survey only one population at a time. Note that  $V$  can be easily transformed into the economic cost of losing a species ( $c$ ). A species persists in the network when it is not extinct from the whole network; therefore we can define  $p_0$  as  $p_0 = 1 - p_e^n$ .

Similarly we can redefine the probability of persistence of the species across the network when one population is managed ( $p_m$ ) as  $p_m = 1 - p_e^{n-1} p_m$ .

We then define the probability of a species being detected, if present, when we survey one node ( $d$ ). We first define the probability of not detecting the species across the network if one node is surveyed as  $(1 - d_s)(1 - d_n)^{n-1}$ . The probability of detecting at least one species across the  $n$  populations is  $d = 1 - (1 - d_s)(1 - d_n)^{n-1}$ .

We have redefined the key parameters defined in Chadès et al. (3) and provide an approximate solution to how long we should manage and survey  $n$  independent populations (Fig. S5).

1. Cassandra AR (1998) Exact and approximate algorithms for partially observable Markov decision processes. PhD thesis (Brown University, Providence, RI).
2. Bahar RI, et al. (1997) Algebraic decision diagrams and their applications. *Form Methods Syst Des* 10:171–206.
3. Chadès I, et al. (2008) When to stop managing or surveying cryptic threatened species. *Proc Natl Acad Sci USA* 105:13936–13940.

4. Canadian Wildlife Service and US Fish and Wildlife Service (2007) *International Recovery Plan for the Whooping Crane* (Recovery of Nationally Endangered Wildlife (RENEW), Ottawa and US Fish and Wildlife Service, Albuquerque, NM), p 162.
5. Loomis J, Ekstrand E (1997) Economic benefits of critical habitat for the Mexican spotted owl: A scope test using a multiple-bounded contingent valuation survey. *J Agric Resour Econ* 22:356–366.

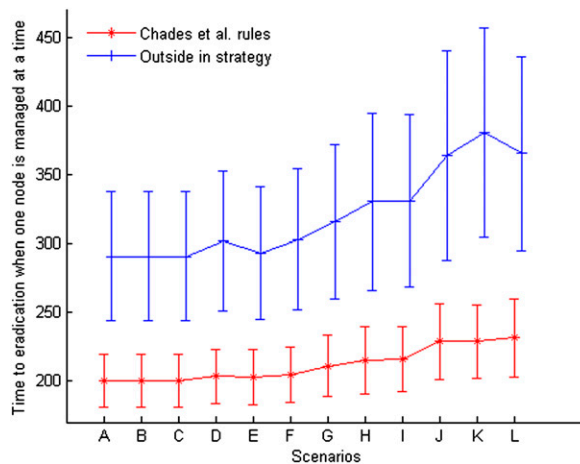

Fig. S1. Time to eradication on a star network of 101 nodes when 1 node can be managed at a time under 12 scenarios (Table S2). Error bars represent SD.





**Table S1. Parameters used for our general case study**

| MDP/POMDP parameters                                                                      | Value |
|-------------------------------------------------------------------------------------------|-------|
| Probability of a node being infected if one neighbor is infected ( $p_d$ )                | 0.1   |
| Probability of a node becoming susceptible if infected and not managed ( $p_e$ )          | 0.01  |
| Probability of a node becoming susceptible if it has been managed ( $p_m$ )               | 0.7   |
| Probability of detecting an infected node when "manage" or "do nothing" is used ( $d_n$ ) | 0.1   |
| Probability of detecting an infected node when "survey" is used ( $d_s$ )                 | 0.7   |
| Cost of managing one node ( $c_m$ )                                                       | 100   |
| Cost of surveying one node ( $c_s$ )                                                      | 50    |
| Cost of a node being infected ( $c$ )                                                     | 100   |

We derived our rules of thumb assuming a hypothetical infection for our SIS network model.

**Table S2. Robustness of Chadès et al.'s rules (this study) for a star network of 101 nodes when varying the management option under different uncertain scenarios**

| Simulation scenarios                                      | Maximal variation in dispersal ( $p_d$ ) | Maximal variation in recovery ( $p_m$ ) | Improvement under different management options: no. treatments avoided (%) |              |            |
|-----------------------------------------------------------|------------------------------------------|-----------------------------------------|----------------------------------------------------------------------------|--------------|------------|
|                                                           |                                          |                                         | 1 node                                                                     | 2 nodes      | 5 nodes    |
| A                                                         | 0                                        | 0                                       | 90.68 (31.2)                                                               | 20.36 (10.7) | 5.68 (3.3) |
| B                                                         | 0.05                                     | 0                                       | 90.68 (31.2)                                                               | 20.36 (10.7) | 5.68 (3.3) |
| C                                                         | 0.1                                      | 0                                       | 90.68 (31.2)                                                               | 20.36 (10.7) | 5.68 (3.3) |
| D                                                         | 0                                        | 0.1                                     | 98.32 (32.6)                                                               | 21.65 (11.1) | 5.68 (3.3) |
| E                                                         | 0.05                                     | 0.1                                     | 90.20 (30.8)                                                               | 20.23 (10.5) | 5.33 (3.1) |
| F                                                         | 0.1                                      | 0.1                                     | 98.61 (32.5)                                                               | 21.79 (11.2) | 5.08 (3.0) |
| G                                                         | 0                                        | 0.2                                     | 105.08 (33.2)                                                              | 22.35 (11.1) | 6.40 (3.6) |
| H                                                         | 0.05                                     | 0.2                                     | 115.45 (34.9)                                                              | 23.51 (11.6) | 5.66 (3.2) |
| I                                                         | 0.1                                      | 0.2                                     | 115.29 (34.8)                                                              | 23.60 (11.5) | 5.98 (3.3) |
| J                                                         | 0                                        | 0.3                                     | 135.81 (37.2)                                                              | 24.97 (11.5) | 6.89 (3.6) |
| K                                                         | 0.05                                     | 0.3                                     | 151.81 (39.8)                                                              | 27.59 (12.8) | 6.72 (3.5) |
| L                                                         | 0.1                                      | 0.3                                     | 134.15 (36.7)                                                              | 26.30 (12.0) | 7.65 (3.9) |
| Average performance of Chadès et al.'s rules (this study) |                                          |                                         | 111.42 (34.1)                                                              | 22.97 (11.3) | 6.07 (3.4) |

**Table S3. Optimal starting node, centrality measures, and connectance for nine small networks**

| Node/optimal starting node                                                             | Closeness centrality | Eigenvector centrality | Subgraph centrality | Betweenness centrality |
|----------------------------------------------------------------------------------------|----------------------|------------------------|---------------------|------------------------|
| Connectance = 0.143                                                                    |                      |                        |                     |                        |
| 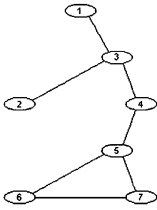 1*   | 0.375*               | 6.19901E-06            | 1.639827167         | 0                      |
| 2*                                                                                     | 0.375*               | 6.19901E-06            | 1.639827167         | 0                      |
| 3                                                                                      | 0.545454545          | 0.000474185            | 2.970722293         | 18                     |
| 4                                                                                      | 0.6                  | 0.020593476            | 2.405064022         | 18                     |
| 5                                                                                      | 0.545454545          | 0.467122568            | 3.548827737         | 16                     |
| 6                                                                                      | 0.4                  | 0.446541381            | 2.785170056         | 0                      |
| 7                                                                                      | 0.4                  | 0.446541381            | 2.785170056         | 0                      |
| Connectance = 0.222                                                                    |                      |                        |                     |                        |
|  1*   | 0.6666666666666667*  | 1.11022E-16            | 1.589091778         | 0                      |
| 2                                                                                      | 1                    | 0                      | 2.178183557         | 2                      |
| 3*                                                                                     | 0.6666666666666667*  | 4.44089E-16            | 1.589091778         | 0                      |
| Connectance = 0.111                                                                    |                      |                        |                     |                        |
|  1*   | 0.2666666666666667*  | 5.47939E-08            | 1.590664613         | 0                      |
| 2                                                                                      | 0.347826087          | 6.2538E-06             | 2.230519482         | 14                     |
| 3                                                                                      | 0.444444444          | 0.000467986            | 2.332523605         | 24                     |
| 4                                                                                      | 0.533333333          | 0.021049118            | 3.09935418          | 32                     |
| 5                                                                                      | 0.470588235          | 0.020587331            | 2.406658041         | 16                     |
| 6                                                                                      | 0.421052632          | 0.021042808            | 3.045334013         | 16                     |
| 7                                                                                      | 0.4                  | 0.020581076            | 2.354238711         | 4                      |
| 8                                                                                      | 0.444444444          | 0.020581132            | 2.35586695          | 8                      |
| 9                                                                                      | 0.307692308          | 0.000455588            | 1.641877645         | 0                      |
| Connectance = 0.11                                                                     |                      |                        |                     |                        |
|  1   | 0.25*                | 6.60899E-12            | 2.387727503         | 1                      |
| 2                                                                                      | 0.3                  | 3.54822E-10            | 2.43854041          | 7                      |
| 3                                                                                      | 0.375                | 5.58534E-08            | 3.184818517         | 37                     |
| 4                                                                                      | 0.3                  | 3.54822E-10            | 2.43854041          | 7                      |
| 5                                                                                      | 0.409090909          | 6.19972E-06            | 2.336976825         | 40                     |
| 6                                                                                      | 0.409090909          | 0.000461732            | 2.283417888         | 40                     |
| 7                                                                                      | 0.375                | 0.020581077            | 2.354295345         | 36                     |
| 8                                                                                      | 0.321428571          | 0.467110059            | 3.547158417         | 28                     |
| 9*                                                                                     | 0.257142857          | 0.446535126            | 2.785135174         | 0                      |
| 10*                                                                                    | 0.257142857          | 0.446535126            | 2.785135174         | 0                      |
| Connectance = 0.083                                                                    |                      |                        |                     |                        |
|  1  | 0.323529412          | 0                      | 2.336885376         | 22                     |
| 2                                                                                      | 0.275                | -3.60822E-16           | 2.284499388         | 10                     |
| 3                                                                                      | 0.239130435          | -3.60822E-16           | 2.282898901         | 4                      |
| 4                                                                                      | 0.275                | 2.77556E-16            | 2.284499388         | 10                     |
| 5                                                                                      | 0.323529412          | 2.77556E-17            | 2.336885376         | 22                     |
| 6                                                                                      | 0.392857143          | 1.33227E-15            | 3.079961857         | 64                     |
| 7                                                                                      | 0.392857143          | -5.55112E-17           | 2.335398156         | 60                     |
| 8                                                                                      | 0.366666667          | -1.11022E-16           | 2.338600345         | 56                     |
| 9                                                                                      | 0.323529412          | -1.11022E-15           | 3.1848471           | 49                     |
| 10*                                                                                    | 0.261904762          | -1.66533E-15           | 2.438540723         | 9                      |
| 11*                                                                                    | 0.22*                | -1.22125E-15           | 2.387727512         | 1                      |
| 12*                                                                                    | 0.261904762          | -1.44329E-15           | 2.438540723         | 9                      |
| Connectance = 0.088                                                                    |                      |                        |                     |                        |
|  1* | 0.184615384615385*   | -1.11128E-15           | 2.387727503         | 1                      |
| 2*                                                                                     | 0.214285714          | 2.4434E-15             | 2.438540407         | 10                     |
| 3                                                                                      | 0.255319149          | 1.6714E-12             | 3.184818151         | 55                     |
| 4*                                                                                     | 0.214285714          | 2.55963E-15            | 2.438540407         | 10                     |
| 5                                                                                      | 0.285714286          | 3.54855E-10            | 2.336942307         | 64                     |
| 6                                                                                      | 0.307692308          | 5.65615E-08            | 2.281299105         | 70                     |
| 7                                                                                      | 0.315789474          | 6.42527E-06            | 2.279650222         | 72                     |
| 8                                                                                      | 0.307692308          | 0.000487437            | 2.28184756          | 70                     |
| 9                                                                                      | 0.285714286          | 0.02253151             | 2.363206665         | 64                     |
| 10                                                                                     | 0.255319149          | 0.557314127            | 3.875563984         | 54                     |
| 11                                                                                     | 0.218181818          | 1.005338126            | 4.335579023         | 10                     |
| 12                                                                                     | 0.184615384615385*   | 0.513687999            | 3.027562192         | 0                      |
| 13                                                                                     | 0.218181818          | 1.005338126            | 4.335579023         | 10                     |
